# Supplementary material for: Germ Warfare in a Microbial Mat Community: CRISPRs Provide Insights into the Co-Evolution of Host and Viral Genomes
Source: PLoS One. 2009 Jan 9;4(1):e4169. doi: 10.1371/journal.pone.0004169 (PMC2612747; doi:10.1371/journal.pone.0004169)
Supplement: Table S2 — Comparison of syntenic genes flanking the CRISPR loci (0.05 MB XLS) [file pone.0004169.s002.xls]

## Sheet: Sheet1
CLUSTER 1A
Com_Name	putative CRISPR-associated protein, APE2256 family	hypothetical protein	putative CRISPR-associated RAMP protein	hypothetical protein	CRISPR-associated RAMP protein	CRISPR-associated RAMP protein, SSO1426 family	hypothetical protein	hypothetical protein	hypothetical protein	CRISPR-associated RAMP protein, Csx10 family	CRISPR-associated RAMP protein	CRISPR-associated protein, Crm2 family	CRISPR-associated protein Cas6	mini-IS element, transposase, degenerate	TYPE I Repeat (copies)	CRISPR-associated protein Cas2	CRISPR-associated protein Cas1, interruption-C	ISSoc1, transposase	CRISPR-associated protein Cas1, interruption-N	hypothetical protein	CRISPR-associated protein, Csx3 family	nitrate ABC transporter, ATP-binding protein NtrD	nitrate ABC transporter, ATP-binding protein NtrC	nitrate ABC transporter, permease protein	nitrate/nitrite/cyanate ABC transporter (NitT) family, substrate-binding protein	putative tocopherol cyclase
OS-A locus	CYA_0871	CYA_0873	CYA_0874	CYA_0875	CYA_0876	CYA_0877	CYA_0878	Unique	CYA_0879	CYA_0880	CYA_0881	CYA_0882	CYA_0883	CYA_0884	GTTTCCGTCCCCTTGCGGGGAAAAGGTAGGGATCAAC (41?)	CYA_0885	CYA_0886	CYA_0887	CYA_0888	CYA_0889	CYA_0890	CYA_0891	CYA_0892	CYA_0893	CYA_0894	CYA_0896
OSA Coords	877467..878363	878417..879133	879144..880196	880193..880651	880648..881622	881677..882519	882527..882664	Unique	882668..883114	883111..884334	884334..885047	885047..887242	887772..888923	888957..889079	AGAGGCATGCTCTTGCAGGGAGAAGGTAGAGATCAAC (1)	892609..892887	892887..893360	893440..894633	894635..894885	894897..895712	896418..897338	897554..898417	898480..900489	900649..901476	902016..903320	903531..904487
NAID	0.84	96% B is only 1/2 the length	0.88	0.91	0.89	0.88	Unique	Unique	0.85	0.86	0.86	0.87	0.94	1		Unique	Unique	0.92	Unique	0.82	0.94	0.89	0.9	0.94	0.92	0.89
AAID	0.87	0.84	0.85	0.88	0.91	0.93	Unique	Unique	0.93	0.92	0.91	0.92	0.94			Unique	Unique	0.93	Unique	0.87	0.91	0.94	0.98	0.98	0.98	0.92
AASIM	0.95	0.74	0.9	0.94	0.94	0.89	Unique	Unique	0.83	0.87	0.87	0.86	0.92			Unique	Unique	0.9	Unique	0.78	0.87	0.91	0.97	0.96	0.98	0.89
OSB locus	CYB_0585	CYB_0586	CYB_0587	CYB_0588	CYB_0589	CYB_0590	Unique	CYB_0591	CYB_0592	CYB_0593	CYB_0594	CYB_0595	CYB_0596	NOT A CALLED GENE	AGAGGCATGCTCTTGCAGGGAGAAGGTAGAGATCAAC (1)	Unique	Unique	CYB_0598	Unique	CYB_0597	CYB_0599	CYB_0601	CYB_0602	CYB_0603	CYB_0604	CYB_0605
OSB Coords	592183..593079	593129..593842	593853..594932	594935..595387	595384..596364	596531..597382	Unique	597402..598049	598053..598493	598490..599722	599722..600444	600444..602654	603175..604356	604512..604390	GTTTCCGTCCCCTTGCGGGGAAAAGGTAGGGATCAAC (8)	Unique	Unique	605551..606744	Unique	606716..608173	608339..609307	610278..611165	611237..613234	613303..614130	614652..615956	616167..617264
CLUSTER 1B
Com_Name	hypothetical protein	pentapeptide repeat family protein	putative membrane protein, YjgP/YjgQ family	alanine dehydrogenase	ABC transporter, permease protein	ABC transporter, ATP-binding protein	3'-5' exonuclease family protein	ribosomal protein S14	hypothetical protein	hypothetical protein	GTP-binding protein	hypothetical protein	hypothetical protein	hypothetical protein
OS-A locus	CYA_1109	CYA_1110	CYA_1111	CYA_1112	Unique	Unique	CYA_1113	CYA_1114	CYA_1115	CYA_1117	CYA_1116	CYA_1118	has NA sim in in intragenic Bad gene call?	CYA_1119
OSA Coords	1135414..1137369	1137368..1138585	1138774..1139904	1140938..1142029	Unique	Unique	1142039..1142671	1142911..1143216	1143110..1143379	1143361..1143684	1143681..1145201	1145282..1145773	Unique	1146148..1146600
NAID	0.82	0.83	0.86	0.86	Unique	Unique	0.84	0.93	OVERLAP?	0.78	0.86	0.85	Unique	0.78
AAID	0.79	0.82	0.9	0.94	Unique	Unique	0.88	0.99	UNIQUE??	0.73	0.89		Unique	0.77
AASIM	0.85	0.87	0.95	0.96	Unique	Unique	0.93	1		0.86	0.94		Unique	0.89
OSB locus	CYB_1355	CYB_1356	CYB_1357	CYB_1358	CYB_1359	CYB_1360	CYB_1361	CYB_1362		CYB_1364	CYB_1363	CYB_1365	CYB_1366	CYB_1367 (Truncated)
OSB Coords	1423513..1425348	1425514..1426740	1426849..1427961	1429582..1430670	1430708..1431481	1431558..1432418	1432669..1433301	1433359..1433664		1433861..1434175	1434172..1435719	1435803..1436294	1436483..1436593	1436814..1437128
CLUSTER 2A
Com_Name	Psuedogene Transposase	hypothetical protein	hypothetical protein	hypothetical protein	oxidoreductase, 2OG-Fe(II) oxygenase family	CRISPR-associated protein Cas2	CRISPR-associated protein Cas1	hypothetical protein	CRISPR-associated RAMP protein, Cmr6 family	hypothetical protein	hypothetical protein	CRISPR-associated RAMP protein, Cmr4 family	hypothetical protein	CRISPR-associated protein, Crm2 family	CRISPR-associated protein, TM1812 family	hypothetical protein	hypothetical protein	hypothetical protein	hypothetical protein
OS-A locus	NONE	CYA_2535	CYA_2536	CYA_2537	CYA_2538	CYA_2539	CYA_2540 (FS)	CYA_2541	CYA_2542	CYA_2543	CYA_2544	CYA_2545	CYA_2546	CYA_2547	CYA_2548	CYA_2549	Unique	CYA_2550	Unique
OSA Coords	2553689..2555486	2555487..2555579	2555606..2556028	2556041..2557471	2558326..2559216	2559707..2559985	2559985..2560974	560974..2561273	2561306..2563264	2563294..2563935	2563935..2564327	2564341..2565111	2565157..2566281	2566278..2569103	2569518..2570837	2570815..2570973	Unique	2571016..2571600	Unique
NAID	Unique	Unique	Unique	Unique	Unique	0.99	0.85	0.78	0.76	0.87	0.84	0.83	0.77	0.8	0.8	Unique	Unique	84% BUT 60% length)	Unique
AAID	Unique	Unique	Unique	Unique	Unique	1	0.9	0.76	0.77	0.92	0.86	0.83	0.79	0.82	0.79	Unique	Unique	0.69	Unique
AASIM	Unique	Unique	Unique	Unique	Unique	1	0.96	0.86	0.87	0.84	0.92	0.92	0.84	0.88	0.88	Unique	Unique	0.78	Unique
OSB locus	Unique	Unique	Unique	Unique	Unique	CYB_0834	CYB_0835	CYB_0836	CYB_0837	CYB_0838	CYB_0839	CYB_0840	CYB_0841	CYB_0842	CYB_0843	Unique	CYB_0844	CYB_0845	CYB_0846
OSB Coords	Unique	Unique	Unique	Unique	Unique	867437..867715	867715..868704	868704..869003	869033..870856	870887..871528	871528..871920	871945..872715	872763..873902	873899..876886	877089..878468	Unique	878454..878615	878590..879339	879472..879990
CLUSTER 2B
Com_Name	ISSoc1, transposase	hypothetical protein	metal chelate ABC transporter, metal chelate-binding protein	carotenoid isomerase	iron-sulfur cluster-binding protein, Rieske family	spermidine/putrescine ABC transporter, permease protein	spermidine/putrescine ABC transporter, ATP-binding protein	hypothetical protein	hypothetical protein
OS-A locus	Not in area	CYA_1856	CYA_1855	CYA_1857	Unique	CYA_1858	CYA_1859	CYA_1860	CYA_1861
OSA Coords		1860049..1860273	1860270..1861091	1861251..1862810	Unique	1862898..1863845	1863839..1864972	1865040..1865843	1865824..1865940
NAID		Unique	Unique	0.83	Unique	0.92	0.91	0.81	has about 1/2 the DNA… Bad Gene call…
AAID		Unique	Unique	0.85	Unique	0.88	0.88	0.82
AASIM		Unique	Unique	0.9	Unique	0.92	0.92	0.88
OSB locus	CYB_1297	Unique	Unique	CYB_1298	CYB_1300	CYB_1299	CYB_1301	CYB_1302
OSB Coords	1358130..1359347	Unique	Unique	1359648..1361204	1361408..1362427	1362410..1363360	1363354..1364508	1364733..1365587
CLUSTER 2C
Com_Name	RNA polymerase sigma factor	glycine cleavage system T protein	transposase, truncation	lactoylglutathione lyase	TonB family protein	glyoxalase family protein	hypothetical protein	O-succinylbenzoate synthetase	prfB - FS	hypothetical protein	putative methyl-accepting chemotaxis protein	GAF domain protein	peptidyl-tRNA hydrolase
OS-A locus	CYA_1243	CYA_1242	Not in area	CYA_1244	CYA_1245	CYA_1246	CYA_1247	CYA_1249	CYA_1248	CYA_1251	CYA_1250	CYA_1252	CYA_1253
OSA Coords	1254523..1255479	1255463..1256599	Not in area	256666..1257100	1257125..1258216	1258476..1258955	1258973..1259830	1260709..1261710	1261707..1262835	1263140..1263502	1263499..1264620	1264886..1266106	1266259..1266936
NAID	0.85	0.83	Not in area	Unique	0.83	0.88	0.91	0.8	0.88	0.83	0.85	0.82	0.8
AAID	0.91	0.85	Not in area	Unique	0.9	0.82	0.81	0.72	FS	0.86	0.88	0.86	0.8
AASIM	0.96	0.91	Not in area	Unique	0.95	0.89	0.89	0.81	FS	0.92	0.95	0.91	0.88
OSB locus	CYB_1142	CYB_1141	CYB_1140	Unique	CYB_1139 Half missing	CYB_1138	CYB_1137	CYB_0729	CYB_0730	CYB_0728	CYB_0727	CYB_0726	CYB_0725
OSB Coords	1178803..1179762	1177669..1178793	1176691..1177398	Unique	1175391..1176530	1174615..1175091	1173715..1174596	749863..750927	748735..749866	748011..748394	746837..747958	745337..746554	744475..745149
CLUSTER 2D
Com_Name	iron-sulfur cluster-binding protein	carbohydrate kinase, FGGY family	ABC1 domain protein	AhpC/TSA family protein	hypothetical protein	putative lipoprotein	cyclopropane-fatty-acyl-phospholipid synthase	Fe-S metabolism protein, SufE family	putative zinc ABC transporter, periplasmic zinc-binding protein	manganese/zinc/iron chelate ABC ransporter (MZT) family, ATP-binding protein	manganese/zinc/iron chelate ABC transporter (MZT) family, permease protein	hypothetical protein
OS-A locus	CYA_1946	CYA_1947	CYA_1948	CYA_1949	CYA_1950	CYA_1951	CYA_2534	CYA_2533	CYA_2532	CYA_2531	CYA_2529	CYA_2530
OSA Coords	958288..1958773	1958780..1960201	1960584..1962242	1962280..1962861	1962899..1963336	1963340..1963903	2552549..2553688	2551995..2552438	2550890..2551981	2550123..2550893	2549277..2550113	2548507..2549280
NAID	0.82	0.77	0.84	0.83	0.8	0.83	0.86	0.81	0.81	0.8	0.83	0.85
AAID	0.87	0.8	0.9	0.88	0.8	0.7	0.88	0.85	0.8	0.8	0.84	0.79
AASIM	0.93	0.87	0.95	0.95	0.87	0.79	0.94	0.93	0.89	0.89	0.92	0.85
OSB locus	CYB_0815	CYB_0816	CYB_0141	CYB_0140	CYB_0139	CYB_0138	CYB_0142	CYB_0143	CYB_0144	CYB_0145	CYB_0147	CYB_0146
OSB Coords	844279..844764	844860..846245	154702..156357	154075..154656	153600..154037	152926..153597	159250..160389	160487..160930	160944..162065	162062..162862	162873..163709	163678..164529
CLUSTER 2E
Com_Name	4-hydroxythreonine-4-phosphate dehydrogenase	putative dehydrogenase, E1 component, beta subunit	transporter, small conductance mechanosensitive ion channel (MscS) family, authentic frameshift
OS-A locus	CYA_2324	CYA_2326	CYA_2327
OSA Coords	2326912..2327961	2329476..2330453	2330706..2331320
NAID	0.77	0.87	Unique
AAID	0.81	0.96	Unique
AASIM	0.88	0.99	Unique
OSB locus	CYB_1766	CYB_1765	Unique
OSB Coords	1850375..1851397	1849211..1850191	Unique
CLUSTER 2F
Com_Name	NAD-dependent epimerase/dehydratase family protein	UDP-glucose dehydrogenase	ation transporter, cation diffusion facilitator (CDF) family	Ser/Thr protein phosphatase family protein	uracil phosphoribosyltransferase	sensor histidine kinase/response regulator	putative methyl-accepting chemotaxis protein	CheW domain protein	response regulator	response regulator	response regulator	hypothetical protein	electron transfer flavoprotein, alpha subunit/FixB family protein	electron transfer flavoprotein, beta subunit/FixA family protein	Tat (twin-arginine translocation) pathway signal sequence domain protein	hypothetical protein	arginyl-tRNA synthetase
OS-A locus	CYA_0484	CYA_0485	CYA_0486	Unique	Unique	CYA_2742	CYA_2741	CYA_2740	CYA_2739	CYA_2738	CYA_2737	CYA_2736	CYA_2735	CYA_2734	Unique	CYA_2733	CYA_2732
OSA Coords	501723..502670	502667..504085	504227..505141	Unique	Unique	2758450..2763711	2755812..2758262	2755039..2755503	2754508..2754873	2754125..2754511	2752755..2753897	2752181..2752465	2751044..2752162	2750055..2750906	Unique	2749921..2750025	2747913..2749709
NAID	0.83	0.83	0.8	Unique	Unique	100 on the ends but not in middle??	0.85	0.88	0.92	0.85	0.89	0.87	0.87	0.92	Unique	Unique	0.88
AAID	0.88	0.89	0.78	Unique	Unique	0.72	0.79	0.92	0.98	0.89	0.92	0.95	0.87	0.93	Unique	Unique	0.94
AASIM	0.95	0.95	0.88	Unique	Unique	0.77	0.86	0.96	0.99	0.94	0.96	0.97	0.94	0.96	Unique	Unique	0.96
OSB locus	CYB_1929	CYB_1930	CYB_1931	CYB_1932	CYB_1933	CYB_1934	CYB_1935	CYB_1936	CYB_1937	CYB_1938	CYB_1939	CYB_1940	CYB_1941	CYB_1942	CYB_1943	Unique	CYB_1944
OSB Coords	2012676..2013623	2013648..2015054	2015190..2016095	2018591..2019751	2019866..2020501	2020574..2025991	2026183..2028675	2028967..2029485	2029601..2029966	2029963..2030340	2030529..2031671	2031905..2032189	2032212..2033330	2033503..2034327	2034749..2035831	Unique	2036152..2037948
CLUSTER 2G
Com_Name	Transposase, degenerate	hypothetical protein	acetyltransferase, GNAT family	hypothetical protein	polyamine transporter, periplasmic polyamine-binding protein		CAB/ELIP/HLIP family protein	hypothetical protein	sensory box histidine kinase/response regulator	hypothetical protein		hypothetical protein	tRNA-Leu	hypothetical protein	queuine tRNA-ribosyltransferase	hypothetical protein	hypothetical protein	hypothetical protein
OS-A locus		CYA_2175	CYA_2174	Unique but a small part is in CYA_1854	CYA_2832	CYA_2833	CYA_2834	CYA_2835	CYA_2836	CYA_2837	CYA_2838	CYA_2839	CYA_2840	Unique	CYA_2841	CYA_2842	CYA_2843	CYA_2844
OSA Coords		2191277..2191987	2190749..2191273	Unique	2850743..2851807	DNA IS ALSO IN CYB_0506	2851881..2852051	2852088..2852207	2852264..2856835	2857206..2857583	DNA IS ALSO IN CYB_0508	2858386..2858478	2858884..2858802	Unique	2859006..2860109	2860211..2860822	2860886..2862127	2862134..2862430
NAID	83% (over 60% sequence)	0.82	0.88	Unique	0.82		0.92	Unique	0.89	0.7		Unique	1	Unique	0.85	0.76	0.81	0.83
AAID		0.87	0.92	Unique	0.85		0.92	Unique	0.91	0.68		Unique		Unique	0.91	0.79	0.85	0.78
AASIM		0.92	0.96	Unique	0.91		0.94	Unique	0.94	0.88		Unique		Unique	0.95	0.89	0.91	0.85
OSB locus	CYB_0501	CYB_0502	CYB_0503	CYB_0504	CYB_0505		CYB_0506	Unique	CYB_0507	CYB_0508		Unique	CYB_0509	CYB_0510	CYB_0511	CYB_0512	CYB_0513	CYB_0514
OSB Coords	512516..513949	513959..514663	514667..515191	516636..516815	516914..518011		518074..518244	Unique	518503..523083	523547..523924		Unique	23982..524064	524077..524187	524190..525287	525407..526018	526113..527378	527385..527681
CLUSTER 3A
Com_Name	exonuclease, SbcC family	hypothetical protein	hypothetical protein	hypothetical protein	CobN/magnesium chelatase domain protein	transaldolase	SSoc2, transposase	ISSoc2, resolvase	CRISPR-associated protein Cas2	CRISPR-associated protein Cas1	CRISPR-associated protein, Cse3 family	CRISPR-associated protein Cas5, Ecoli subtype	CRISPR-associated protein, Cse4 family	CRISPR-associated protein, Cse2 family	CRISPR-associated protein, Cse1 family	CRISPR-associated helicase Cas3	hypothetical protein	ISSoc8, transposase, interruption-N	ISSoc8, transposase, interruption-C	hypothetical protein	pseudouridine synthase, RluA family	phosphoenolpyruvate synthase	putative 2-oxo acid dehydrogenase, acyltransferase
OS-A locus	CYA_0721	CYA_0720	CYA_0722	CYA_0723	CYA_0724	CYA_0725	CYA_0726	CYA_0727	CYA_0728	CYA_0729	CYA_0730	CYA_0731	CYA_0732	CYA_0733	CYA_0734	CYA_0735	CYA_0736	CYA_0737	CYA_0739	CYA_0738	CYA_0740	CYA_0741	CYA_0742
OSA Coords	723925..727215	727212..727643	727936..728202	728199..728519	728569..730068	730086..731264	731379..732659	732514..733107	733729..734001	734001..734948	734975..735607	735589..736212	36216..737358	737425..738024	738036..739610	739627..742308	742311..743219	743274..743990	744741..745103	745048..745221	745386..746318	746652..749111	749181..750440
NAID	0.85	0.81	0.82	0.83	0.88	0.91	not in area (but in genome)	not in area (but in genome)	Unique	Unique	Unique	Unique	Unique	Unique	Unique	Unique	Unique	not in area (but in genome)	not in area (but in genome)	Unique	0.87	0.89	0.84
AAID	0.78	0.83	0.89	0.85	0.91	0.96	not in area (but in genome)	not in area (but in genome)	Unique	Unique	Unique	Unique	Unique	Unique	Unique	Unique	Unique	not in area (but in genome)	not in area (but in genome)	Unique	0.94	0.94	0.85
AASIM	0.84	0.9	0.96	0.92	0.94	0.98	not in area (but in genome)	not in area (but in genome)	Unique	Unique	Unique	Unique	Unique	Unique	Unique	Unique	Unique	not in area (but in genome)	not in area (but in genome)	Unique	0.97	0.97	0.9
OSB locus	CYB_1107	CYB_1108	CYB_1109	CYB_1110	CYB_1111	CYB_1112	not in area (but in genome)	not in area (but in genome)	Unique	Unique	Unique	Unique	Unique	Unique	Unique	Unique	Unique	not in area (but in genome)	not in area (but in genome)	Unique	CYB_1113	CYB_1115	CYB_1116
OSB Coords	1142684..1146001	1146007..1146399	1146498..1146761	1146761..1147090	1147123..1148619	1148655..1149833	not in area (but in genome)	not in area (but in genome)	Unique	Unique	Unique	Unique	Unique	Unique	Unique	Unique	Unique	not in area (but in genome)	not in area (but in genome)	Unique	1150124..1151077	1151415..1153880	1153962..1155236
Symbiobacterium thermophilum IAM 14863 locus ID										STH663	STH669	STH668	STH667	STH666	STH665	STH664
S. thermophilum Coords										729831..730754	737833..738507	737122..737820	735972..737111	735407..735982	733855..735426	731048..733858
NAID										68% over 23%	ND	ND	ND	ND	ND	ND
AAID										0.53	0.37	0.4	0.43	0.29	0.22	0.41
AASIM										0.66	0.54	0.55	0.61	0.47	0.4	0.56
										RoseRS_0645	RoseRS_0646	RoseRS_0647	RoseRS_0648	RoseRS_0649	RoseRS_0650	RoseRS_0651	RoseRS_0652
										798411..799358	799453..800169	800171..800959	800956..802164	802231..802734	802727..804304	804301..807084	807084..808082
										ND	ND	ND	ND	ND	ND	ND	ND
										0.51	0.36	0.33	0.35	0.27	0.25	0.31	0.28
										0.66	0.51	0.48	0.53	0.48	0.39	0.48	0.46
